# Supplementary material
Source: Springer Nature journal article supplement (https://www.springermedizin.de/resource/supplementary/12889_2010_2535_MOESM1_ESM.pdf/9486336)
Supplement: MOESM1 [file 9486336]

| Year: Town, Country     | Participants and setting                                                | Recommended newborn foot length cut off for a reported screening outcome*                                       |
|-------------------------|-------------------------------------------------------------------------|-----------------------------------------------------------------------------------------------------------------|
| 1979: Manchester, UK    | 123 babies born in hospital, measured between 12hrs- 5 days after birth | Foot length <7.2cm to identify babies born light for dates                                                      |
| 1984:Udaipur, India     | 300 babies born in hospital, measured between 24-48 hrs of birth        | Foot length <7.2cm to identify babies born birth weight <2500g                                                  |
| 1988: Bombay, India     | 200 babies born in hospital, measured within 48 hrs of birth            | Foot length <6.5cm to identify babies born <34 gestational weeks                                                |
| 1993: Pune, India       | 89 babies born at home, measured within 48 hrs of birth                 | Foot length <6.3cm to identify babies born <1500grams<br>Foot length <7.5cm to identify babies born <2500 grams |
| 2007: Sarlahi, Nepal    | 1640 babies born in an intervention project, measured within 72hrs      | Foot length <6.9cm to identify babies born <2000grams                                                           |
| 2009: Kaohsiung, Taiwan | 256 hospital retrospective record review from routine birth data        | Reports an association with birth weight but no foot length cut-off recommendation given                        |

\*multiple and different anthropometric outcomes were measured in each project but summarised here are those with relevance to this study
